# Supplementary material for: A kinase inhibitor screen identifies a dual cdc7/CDK9 inhibitor to sensitise triple-negative breast cancer to EGFR-targeted therapy
Source: Breast Cancer Res. 2019 Jul 1;21:77. doi: 10.1186/s13058-019-1161-9 (PMC6604188; doi:10.1186/s13058-019-1161-9)
Supplement: Supplementary file 1 — Table S1. Cell seeding densities. Densities used per TNBC cell line for the kinase inhibitor library screening. Densities are shown as number of cells/well in 96-well plates. (XLSX 10 kb) [file 13058_2019_1161_MOESM1_ESM.xlsx]

## Sheet: Sheet1
Cell line	Seeding Density	Cell line	Seeding Density
	(cells/well)		(cells/well)
Hs578T	8000	MDA-MB-436	8000
HCC1806	8000	SUM1315MO2	18000
BT549	8000	SUM185PE	10000
SKBR7	8000	BT20	20000
MDA-MB-453	10000	SUM229PE	10000
HCC38	10000	SUM52PE	8000
HCC70	15000	MDA-MB-468	10000
HCC1937	15000	SUM149PT	8000
HCC1143	12000	MDA-MB-231	4000
SUM159PT	6000	MDA-MB-157	10000
