# Supplementary material for: A kinase inhibitor screen identifies a dual cdc7/CDK9 inhibitor to sensitise triple-negative breast cancer to EGFR-targeted therapy
Source: Breast Cancer Res. 2019 Jul 1;21:77. doi: 10.1186/s13058-019-1161-9 (PMC6604188; doi:10.1186/s13058-019-1161-9)
Supplement: Supplementary file 2 — Table S2. Composition of in-house ER-negative breast cancer patient cohort. (XLSX 21 kb) [file 13058_2019_1161_MOESM2_ESM.xlsx]

## Sheet: linked_common
mnr6	T-stage	meno	age	affyer	TN	affy-ERBB2-status
880364	T1	pre	53	Neg	yes	low
940205	T2	pre	34	Neg	yes	low
840567	T3	post	70	Neg	no	high
930800	T3	pre	48	Neg	no	low
910926	T1	pre	37	Pos	no	low
680569	T2	pre	43	Neg	yes	low
920150	T2	pre	38	Neg	yes	low
920263	T4	post	69	Neg	yes	low
890278	T1	pre	42	Neg	yes	low
850774	T2	post	58	Pos	no	low
710184	T1	pre	38	Neg	yes	low
910641	T2	pre	48	Neg	no	low
870477	T1	post	67	Pos	no	low
920251	T2	pre	49	Neg	yes	low
891027	T1	post	55	Neg	no	high
850271	T1	post	68	Pos	no	high
910397	T2	pre	34	Neg	yes	low
930660	T1	pre	38	Pos	no	low
680738	T1	pre	35	Neg	yes	low
860976	T2	pre	49	Pos	no	low
890801	T1	post	74	Neg	no	low
900040	T2	pre	32	Neg	yes	low
860045	T2	pre	47	Neg	yes	low
900349	T2	post	63	Neg	no	high
870866	T2	post	63	Neg	no	low
890161	T1	pre	44	Neg	yes	low
890274	T2	pre	40	Neg	no	high
880733	T3	post	82	Pos	no	low
860423	T2	pre	34	Pos	no	high
880148	T2	post	74	Neg	yes	low
870731	T2	pre	40	Neg	no	low
870556	T1	post	60	Neg	no	high
870021	T1	post	58	Neg	no	low
860352	T1	post	63	Neg	yes	low
880540	T2	pre	44	Neg	yes	low
890879	T1	post	57	Neg	no	high
880144	T1	post	66	Neg	yes	low
930492	T2	pre	41	Neg	yes	low
890628	T2	pre	44	Neg	yes	low
920021	T2	pre	43	Pos	no	low
710047	T2	post	58	Neg	yes	low
710147	T2	post	61	Neg	yes	low
710377	T2	pre	39	Neg	yes	low
710207	T1	pre	45	Pos	no	high
870796	T2	pre	54	Neg	no	high
900126	T2	pre	38	Neg	yes	low
870189	T2	pre	33	Neg	yes	low
890440	T1	pre	42	Pos	no	low
910805	T2	post	57	Neg	yes	low
910831	T1	pre	40	Neg	yes	low
920038	T2	pre	58	Pos	no	high
920142	T2	pre	50	Neg	yes	low
930042	T2	pre	39	Neg	yes	low
930121	T2	post	59	Neg	yes	low
930898	T1	pre	47	Pos	no	low
940022	T2	post	73	Neg	yes	low
950066	T1	pre	46	Neg	yes	low
940015	T2	pre	42	Pos	no	low
890342	T1	post	80	Pos	no	low
900752	T2	pre	38	Pos	no	low
881035	T2	pre	48	Pos	no	low
940208	T1	pre	50	Neg	no	high
880953	T1	post	62	Neg	no	high
710437	T1	post	57	Pos	no	low
900916	T1	pre	50	Pos	no	low
910039	T2	pre	40	Pos	no	low
910187	T2	post	78	Pos	no	low
910203	T1	pre	43	Pos	no	high
890892	T1	post	62	Pos	no	low
910674	T2	pre	40	Neg	yes	low
870528	T1	pre	46	Pos	no	low
700005	T1	post	68	Pos	no	low
700053	T1	pre	42	Pos	no	low
700109	T1	post	62	Pos	no	low
930448	T2	pre	36	Pos	no	low
880161	T1	post	66	Neg	no	low
680593	T2	post	71	Neg	yes	low
900178	T1	pre	47	Pos	no	low
930417	T1	pre	44	Neg	yes	low
900186	T1	pre	41	Neg	yes	low
680230	T1	pre	43	Pos	no	high
900196	T2	post	70	Pos	no	low
900219	T2	post	62	Pos	no	high
680329	T2	pre	47	Pos	no	low
680350	T1	post	71	Pos	no	low
680369	T1	pre	47	Pos	no	low
700308	T2	pre	54	Pos	no	high
680374	T1	post	64	Pos	no	low
680394	T1	pre	46	Pos	no	low
700444	T2	post	67	Pos	no	low
900559	T1	post	69	Neg	yes	low
680306	T1	pre	45	Pos	no	low
680481	T2	post	72	Pos	no	low
680514	T1	pre	47	Pos	no	low
910812	T2	post	66	Pos	no	low
911053	T2	pre	43	Pos	no	high
920057	T1	post	61	Pos	no	high
940294	T2	pre	45	Pos	no	low
920105	T2	pre	38	Pos	no	low
920162	T1	post	59	Pos	no	low
920216	T1	pre	44	Pos	no	low
890110	T2	pre	44	Pos	no	low
680818	T1	pre	45	Pos	no	low
900874	T2	post	73	Neg	yes	low
680670	T2	pre	45	Pos	no	low
850969	T2	post	70	Neg	yes	low
680698	T2	pre	41	Pos	no	low
920247	T1	post	71	Pos	no	low
870299	T1	pre	52	Neg	no	low
920465	T2	pre	51	Neg	yes	low
860502	T1	pre	54	Pos	no	low
920480	T2	post	71	Pos	no	low
930407	T1	pre	52	Pos	no	low
921003	T1	post	64	Pos	no	low
930217	T2	pre	43	Neg	no	high
900235	T2	post	69	Pos	no	high
890399	T2	post	68	Neg	yes	low
900063	T1	pre	44	Pos	no	low
890338	T2	pre	51	Pos	no	low
880323	T2	pre	32	Pos	no	low
930662	T2	post	66	Pos	no	low
940543	T1	post	72	Pos	no	low
880915	T1	post	60	Pos	no	low
940032	T2	post	58	Pos	no	high
940162	T2	post	60	Pos	no	low
700235	T1	pre	37	Pos	no	low
940180	T2	post	60	Pos	no	low
700278	T1	pre	36	Neg	yes	low
700461	T2	pre	44	Neg	no	low
900409	T1	pre	47	Pos	no	low
900567	T2	post	66	Pos	no	low
891020	T1	post	61	Pos	no	low
940509	T1	pre	46	Neg	no	high
900733	T2	pre	43	Pos	no	high
900056	T2	post	83	Pos	no	low
940539	T1	post	59	Pos	no	low
890118	T2	pre	34	Neg	yes	low
900059	T2	pre	43	Pos	no	high
940542	T1	pre	43	Pos	no	low
870393	T1	pre	46	Pos	no	high
890225	T1	pre	32	Pos	no	low
880975	T1	pre	47	Pos	no	high
880416	T2	pre	42	Pos	no	high
880956	T2	pre	42	Neg	yes	low
930065	T1	pre	38	Pos	no	low
900459	T1	post	57	Pos	no	low
710205	T2	post	60	Neg	no	low
900903	T1	post	56	Pos	no	low
900951	T3	post	61	Pos	no	low
890360	T1	post	61	Pos	no	low
890270	T1	post	68	Pos	no	low
880815	T1	pre	49	Pos	no	low
880118	T2	pre	44	Pos	no	low
880842	T2	post	69	Pos	no	high
930591	T2	pre	47	Pos	no	low
870615	T1	pre	44	Pos	no	low
860902	T2	post	62	Neg	no	low
890260	T2	pre	42	Neg	yes	low
890698	T2	pre	38	Pos	no	low
860491	T2	post	79	Pos	no	low
921079	T1	pre	48	Neg	no	high
910032	T1	pre	41	Pos	no	low
930070	T1	pre	53	Pos	no	low
910037	T1	pre	50	Pos	no	low
940558	T2	post	73	Pos	no	low
880444	T1	pre	50	Pos	no	high
930864	T1	pre	46	Pos	no	low
890794	T2	pre	53	Pos	no	low
900722	T1	post	64	Pos	no	low
940284	T1	post	66	Pos	no	low
900842	T4	pre	44	Pos	no	low
881034	T2	post	64	Pos	no	low
890904	T1	post	65	Neg	yes	low
900547	T1	post	63	Pos	no	high
880852	T1	post	61	Pos	no	low
921000	T2	pre	44	Pos	no	high
890500	T1	post	73	Pos	no	low
890314	T2	post	74	Pos	no	low
850384	T3	pre	46	Pos	no	low
850381	T1	pre	46	Pos	no	low
860436	T2	post	71	Pos	no	low
880437	T2	post	60	Neg	no	low
880885	T2	pre	29	Neg	yes	low
881017	T2	pre	32	Neg	no	low
940341	T2	post	73	Pos	no	low
910225	T2	post	60	Neg	no	high
940440	T1	pre	47	Neg	yes	low
910520	T1	pre	47	Neg	yes	low
910733	T2	post	62	Pos	no	low
940485	T2	post	61	Pos	no	low
930460	T2	post	78	Neg	yes	low
890344	T3	post	59	Pos	no	low
700401	T1	post	73	Pos	no	low
890340	T2	pre	53	Neg	yes	low
851130	T1	post	65	Pos	no	low
910452	T1	post	73	Pos	no	low
910673	T3	pre	34	Neg	no	high
870270	T1	pre	53	Pos	no	low
870550	T1	pre	47	Pos	no	low
900687	T1	pre	54	Pos	no	low
870177	T1	pre	52	Pos	no	low
900756	T1	pre	53	Pos	no	high
900644	T2	post	68	Pos	no	low
710165	T1	post	70	Pos	no	low
950569	T2	pre	46	Neg	yes	low
871021	T2	pre	43	Pos	no	low
680286	T1	pre	54	Pos	no	low
680285	T1	post	66	Neg	no	high
840955	T2	pre	50	Neg	yes	low
940728	T1	pre	47	Pos	no	low
910872	T2	pre	54	Pos	no	high
880716	T1	post	68	Pos	no	high
881109	T2	pre	49	Neg	yes	low
930167	T1	post	61	Pos	no	low
880356	T2	post	60	Pos	no	low
881030	T1	pre	33	Pos	no	high
930644	T1	pre	50	Neg	yes	low
680264	T1	pre	42	Pos	no	low
710163	T2	pre	27	Neg	no	low
890893	T1	pre	47	Pos	no	low
890622	T2	pre	49	Pos	no	low
870729	T1	pre	47	Neg	no	low
910082	T2	post	58	Neg	no	low
870770	T2	pre	37	Pos	no	low
910200	T2	pre	32	Pos	no	low
871157	T2	pre	49	Pos	no	low
910870	T2	pre	46	Pos	no	low
900958	T1	pre	55	Pos	no	low
870191	T1	pre	32	Pos	no	low
910976	T2	post	72	Pos	no	low
880618	T2	pre	53	Neg	yes	low
910232	T2	post	57	Pos	no	low
870199	T2	post	66	Pos	no	high
871025	T1	pre	46	Neg	yes	low
920063	T2	pre	28	Neg	no	high
850276	T2	pre	50	Pos	no	low
890678	T1	post	69	Neg	no	low
900361	T2	post	69	Pos	no	low
870620	T2	post	59	Pos	no	low
930219	T1	pre	47	Pos	no	low
870276	T2	post	75	Neg	yes	low
880558	T1	pre	48	Neg	yes	low
870277	T1	post	68	Neg	no	high
870787	T2	post	67	Pos	no	low
900894	T2	pre	37	Pos	no	high
910527	T1	pre	52	Neg	no	high
870689	T1	pre	40	Pos	no	low
870732	T2	post	70	Neg	yes	low
880145	T1	post	63	Pos	no	low
870164	T2	pre	28	Neg	no	high
930816	T1	pre	41	Neg	yes	low
880888	T2	pre	46	Pos	no	low
881151	T2	pre	37	Pos	no	low
900887	T1	post	70	Pos	no	low
920482	T2	post	74	Pos	no	low
860455	T2	pre	53	Pos	no	low
871164	T1	post	73	Neg	no	high
871046	T2	post	59	Pos	no	low
870328	T2	post	72	Neg	yes	low
890831	T2	pre	43	Neg	no	high
940008	T2	post	63	Pos	no	low
891041	T1	post	68	Pos	no	low
940048	T2	post	60	Neg	yes	low
940206	T1	pre	44	Pos	no	low
860621	T1	pre	38	Pos	no	low
870771	T2	post	73	Pos	no	low
871169	T2	post	75	Pos	no	low
861188	T1	pre	52	Pos	no	low
880388	T1	pre	52	Pos	no	low
880021	T1	post	58	Pos	no	low
940290	T2	pre	29	Pos	no	low
881231	T1	pre	47	Pos	no	low
900192	T1	post	66	Neg	yes	low
900711	T2	post	55	Neg	no	high
900772	T1	post	55	Pos	no	low
890659	T2	pre	51	Pos	no	low
910461	T2	pre	44	Pos	no	high
870376	T1	pre	26	Neg	no	high
861127	T1	pre	49	Pos	no	low
890093	T3	pre	37	Pos	no	low
900158	T1	pre	43	Pos	no	low
870302	T1	pre	50	Pos	no	low
710162	T2	pre	51	Pos	no	high
900489	T2	pre	53	Neg	yes	low
710288	T1	pre	41	Pos	no	low
890444	T1	post	71	Pos	no	low
860741	T2	post	60	Pos	no	low
871130	T2	pre	40	Pos	no	low
870018	T1	post	62	Pos	no	low
910128	T2	pre	52	Pos	no	low
890807	T1	post	61	Pos	no	low
870602	T1	post	55	Pos	no	low
680691	T1	post	69	Pos	no	low
870527	T2	pre	48	Pos	no	high
920276	T1	post	78	Pos	no	low
850479	T2	post	63	Pos	no	low
870775	T1	pre	46	Pos	no	low
700264	T1	pre	39	Neg	no	high
900777	T2	pre	41	Neg	yes	low
920399	T1	post	55	Pos	no	low
900420	T2	pre	51	Pos	no	high
920266	T1	pre	37	Pos	no	high
900496	T2	post	58	Neg	yes	low
920638	T1	post	58	Neg	yes	low
920986	T1	pre	53	Neg	no	high
930254	T1	post	61	Pos	no	low
900949	T1	post	80	Pos	no	high
910463	T2	pre	40	Pos	no	low
910658	T2	post	56	Pos	no	low
920064	T1	post	58	Pos	no	low
890476	T1	post	60	Pos	no	low
920383	T1	post	55	Pos	no	low
920610	T2	pre	42	Pos	no	high
900061	T1	pre	51	Pos	no	low
890608	T2	pre	47	Pos	no	high
911015	T2	pre	45	Neg	no	high
850792	T1	post	61	Pos	no	low
920782	T2	post	56	Pos	no	high
920849	T2	pre	43	Pos	no	low
900073	T1	post	66	Pos	no	low
930205	T1	post	67	Pos	no	low
930213	T2	pre	48	Neg	no	low
930263	T2	pre	47	Pos	no	low
930279	T1	post	69	Neg	no	high
850830	T1	post	60	Neg	no	low
880802	T2	post	74	Neg	yes	high
871145	T1	pre	43	Neg	yes	low
891013	T2	post	71	Pos	no	low
880512	T1	pre	44	Neg	yes	low
930721	T1	pre	43	Neg	yes	low
930729	T2	pre	52	Pos	no	high
930785	T1	post	69	Neg	yes	low
930875	T2	pre	43	Neg	yes	low
940170	T2	pre	42	Neg	no	high
840783	T1	post	57	Neg	no	low
800065	T2	pre	50	Neg	no	high
930411	T4	post	83	Neg	no	high
900317	T1	pre	48	Pos	no	low
890931	T4	pre	55	Pos	no	low
880810	T1	pre	51	Pos	no	low
900881	T1	post	64	Pos	no	low
870950	T2	pre	39	Pos	no	high
930599	T1	pre	40	Pos	no	low
930677	T1	pre	47	Pos	no	low
