# Supplementary material for: A kinase inhibitor screen identifies a dual cdc7/CDK9 inhibitor to sensitise triple-negative breast cancer to EGFR-targeted therapy
Source: Breast Cancer Res. 2019 Jul 1;21:77. doi: 10.1186/s13058-019-1161-9 (PMC6604188; doi:10.1186/s13058-019-1161-9)
Supplement: Supplementary file 7 — Table S3. 34 clinically relevant genes specifically downregulated after co-treatment with lapatinib and PHA-767491 in Hs578T and SKBR7 cells. (XLSX 10 kb) [file 13058_2019_1161_MOESM7_ESM.xlsx]

## Sheet: Sheet1
Table S2 (Related to Figure 6)
Genes	Hazard Ratio (HR)	P-value	95% Confidence Interval (CI) Low	95% Confidence Interval (CI) High
MOCS3	0.11	0	0.031	0.415
SNIP1	0.28	0.01	0.099	0.778
CTGF	1.33	0.02	1.047	1.683
ZCCHC24	1.4	0.05	1.001	1.963
TIMP3	1.43	0.03	1.031	1.989
HEG1	1.44	0.03	1.032	2.013
N4BP2L2	1.44	0.05	0.997	2.092
PRKD3	1.53	0.05	1.009	2.328
LBH	1.54	0.05	1.002	2.353
HOXC6	1.54	0.01	1.106	2.157
ANGPTL4	1.55	0.04	1.015	2.378
TNS1	1.56	0.01	1.128	2.163
PMP22	1.58	0.01	1.132	2.211
ROCK2	1.61	0.05	0.998	2.583
SHOX2	1.69	0.03	1.049	2.715
MITF	1.71	0.04	1.031	2.821
ACAP2	1.75	0.03	1.044	2.95
RANBP2	1.76	0.04	1.032	3
JRKL	1.76	0	1.2	2.583
SLC38A2	1.84	0.04	1.038	3.254
ZFYVE16	1.84	0.03	1.071	3.154
LPCAT1	1.84	0.01	1.154	2.931
MLXIP	1.89	0.01	1.164	3.076
TSC22D1	1.93	0.01	1.158	3.231
RASA1	1.95	0	1.236	3.074
DIP2C	2.04	0.05	1.015	4.095
CRYBG3	2.04	0.04	1.046	3.994
SMAD6	2.07	0.04	1.023	4.177
ARID4A	2.23	0.03	1.096	4.53
C17orf85	2.27	0.02	1.152	4.471
GCNT3	2.31	0	1.361	3.926
DDX3X	2.32	0.05	0.982	5.492
APAF1	2.94	0.04	1.026	8.414
LMBR1L	3.06	0.03	1.099	8.491
